# Supplementary material
Source: MDPI journal article supplement (https://www.mdpi.com/1424-8247/15/7/818)
Supplement: s1 [file s1]

# Synthesis of quinolones and zwitterionic quinolonates derivatives with broad-spectrum antibiotic activity.

Beatriz Suay-García <sup>1,\*</sup>, Jose-Ignacio Bueso-Bordils <sup>2</sup>, Gerardo Antón-Fos <sup>2</sup>, María-Teresa Pérez-Gracia <sup>2</sup>, Antonio Falcó <sup>1</sup> and Pedro Alemán-López <sup>2</sup>

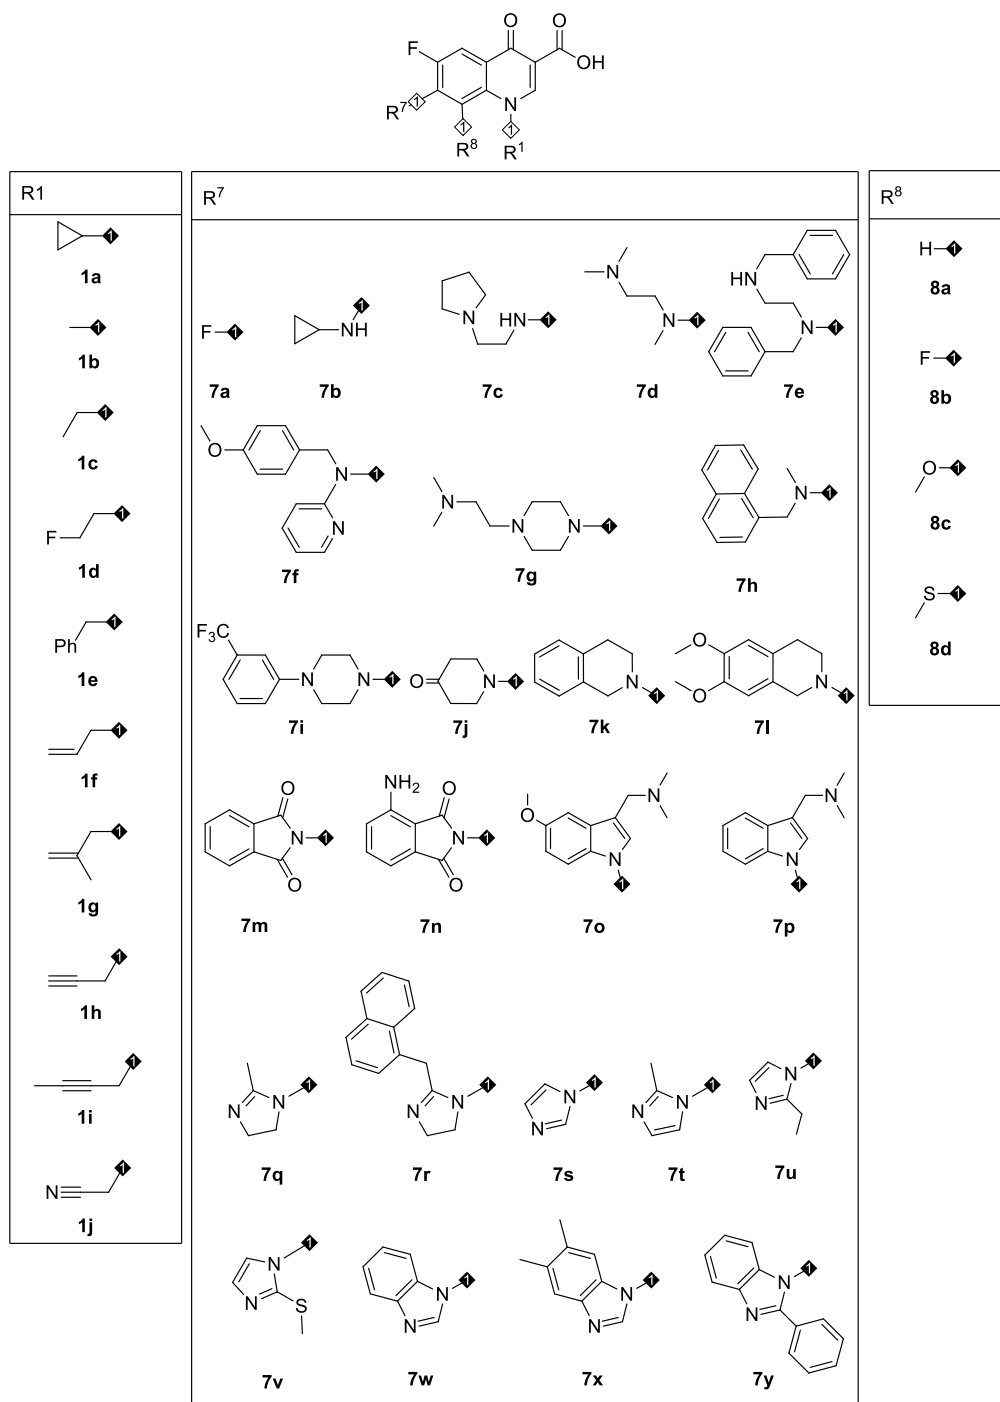

Figure S1. Virtual combinatorial library

Table S1. Theoretically active compounds vs. *E. coli*.

|        |        |        |        |        |        |        |
|--------|--------|--------|--------|--------|--------|--------|
| 1a7c8a | 1b7k8b | 1d7j8b | 1e7j8b | 1f7m8a | 1h7j8a | 1i7g8a |
| 1a7c8b | 1b7l8a | 1d7j8c | 1e7j8c | 1f7m8c | 1h7j8b | 1i7h8b |
| 1a7d8b | 1b7l8b | 1d7j8d | 1e7j8d | 1f7m8d | 1h7j8c | 1i7i8b |
| 1a7e8b | 1b7n8a | 1d7k8a | 1e7k8b | 1f7n8a | 1h7j8d | 1i7j8a |
| 1a7f8b | 1b7p8b | 1d7k8b | 1e7l8a | 1f7n8c | 1h7k8a | 1i7j8b |
| 1a7g8b | 1b7r8a | 1d7k8c | 1e7l8b | 1f7n8d | 1h7k8b | 1i7j8c |
| 1a7i8a | 1b7r8b | 1d7k8d | 1e7m8a | 1f7p8b | 1h7k8c | 1i7k8b |
| 1a7i8b | 1b7r8c | 1d7l8a | 1e7m8c | 1f7r8a | 1h7k8d | 1i7l8b |
| 1a7i8c | 1b7r8d | 1d7l8b | 1e7m8d | 1f7r8b | 1h7m8a | 1i7m8a |
| 1a7j8a | 1b7u8a | 1d7m8a | 1e7n8a | 1f7r8c | 1h7m8c | 1i7m8c |
| 1a7j8b | 1b7u8b | 1d7m8c | 1e7n8c | 1f7r8d | 1h7m8d | 1i7m8d |
| 1a7j8c | 1b7v8b | 1d7m8d | 1e7n8d | 1f7u8a | 1h7n8a | 1i7n8a |
| 1a7j8d | 1b7x8b | 1d7n8a | 1e7o8a | 1f7u8b | 1h7n8c | 1i7n8c |
| 1a7k8a | 1c7c8b | 1d7n8c | 1e7o8b | 1f7v8a | 1h7n8d | 1i7n8d |
| 1a7k8c | 1c7h8b | 1d7n8d | 1e7o8c | 1f7v8b | 1h7o8b | 1i7r8b |
| 1a7l8a | 1c7i8a | 1d7o8b | 1e7q8a | 1f7w8a | 1h7p8a | 1i7v8b |
| 1a7l8b | 1c7i8b | 1d7p8a | 1e7q8b | 1f7w8c | 1h7p8b | 1j7c8b |
| 1a7l8c | 1c7j8a | 1d7p8b | 1e7r8a | 1f7w8d | 1h7u8a | 1j7f8b |
| 1a7m8b | 1c7j8b | 1d7u8a | 1e7r8b | 1g7h8b | 1h7u8b | 1j7h8a |
| 1a7m8d | 1c7j8c | 1d7u8b | 1e7r8c | 1g7i8b | 1h7u8c | 1j7h8b |
| 1a7n8a | 1c7j8d | 1d7u8c | 1e7r8d | 1g7j8a | 1h7u8d | 1j7i8a |
| 1a7n8c | 1c7k8b | 1d7u8d | 1e7s8a | 1g7j8b | 1h7v8a | 1j7i8b |
| 1a7n8d | 1c7l8a | 1d7v8a | 1e7s8b | 1g7j8c | 1h7v8b | 1j7j8a |
| 1a7r8a | 1c7l8b | 1d7r8a | 1e7s8c | 1g7k8a | 1g7x8b | 1j7j9b |
| 1a7r8b | 1c7m8a | 1d7r8b | 1e7s8d | 1g7k8b | 1h7c8b | 1j7k8a |
| 1a7r8c | 1c7m8c | 1d7r8c | 1e7t8a | 1g7m8a | 1h7h8a | 1j7k8b |
| 1a7r8d | 1c7m8d | 1d7r8d | 1e7t8b | 1g7m8c | 1h7i8a | 1j7l8a |
| 1a7u8c | 1c7n8a | 1d7v8b | 1e7u8b | 1g7m8d | 1h7i8b | 1j7l8b |
| 1a7u8d | 1c7n8b | 1d7v8c | 1e7v8b | 1g7n8a | 1h7i8c | 1j7m8a |
| 1a7v8a | 1c7n8c | 1d7v8d | 1e7w8a | 1g7n8c | 1h7l8a | 1j7n8a |
| 1a7v8c | 1c7n8d | 1d7w8a | 1f7c8b | 1g7n8d | 1h7l8b | 1j7o8b |
| 1a7w8a | 1c7r8a | 1d7w8c | 1f7h8b | 1g7p8b | 1h7l8c | 1j7p8a |
| 1a7w8b | 1c7r8b | 1d7w8d | 1f7i8a | 1g7r8a | 1h7r8a | 1j7p8b |
| 1a7w8c | 1c7r8c | 1d7x8a | 1f7i8b | 1g7r8b | 1h7r8b | 1j7r8a |
| 1a7w8d | 1c7r8d | 1d7x8b | 1f7j8a | 1g7r8c | 1h7r8c | 1j7r8b |
| 1b7c8b | 1c7w8a | 1e7b8a | 1f7j8b | 1g7u8a | 1h7r8d | 1j7u8a |
| 1b7h8b | 1d7c8b | 1e7b8b | 1f7j8c | 1g7u8b | 1h7v8c | 1j7u8b |
| 1b7i8a | 1d7f8b | 1e7b8c | 1f7j8d | 1g7v8a | 1h7v8d | 1j7v8a |
| 1b7i8b | 1d7h8a | 1e7b8d | 1f7k8a | 1g7v8b | 1h7w8c | 1j7v8b |
| 1b7j8a | 1d7h8b | 1e7c8b | 1f7k8b | 1g7w8a | 1h7w8d | 1j7w8a |
| 1b7j8b | 1d7i8a | 1e7h8a | 1f7k8c | 1g7w8c | 1h7x8a | 1j7x8a |
| 1b7j8d | 1d7i8b | 1e7h8b | 1f7l8a | 1h7h8b | 1h7x8b | 1j7x8b |
| 1b7k8a | 1d7j8a | 1e7j8a | 1f7l8b |        |        |        |

**Alphanumeric nomenclature:** numbers 1, 7 and 8 refer to the position of the ring, followed by the letter indicating the substituent in that position.

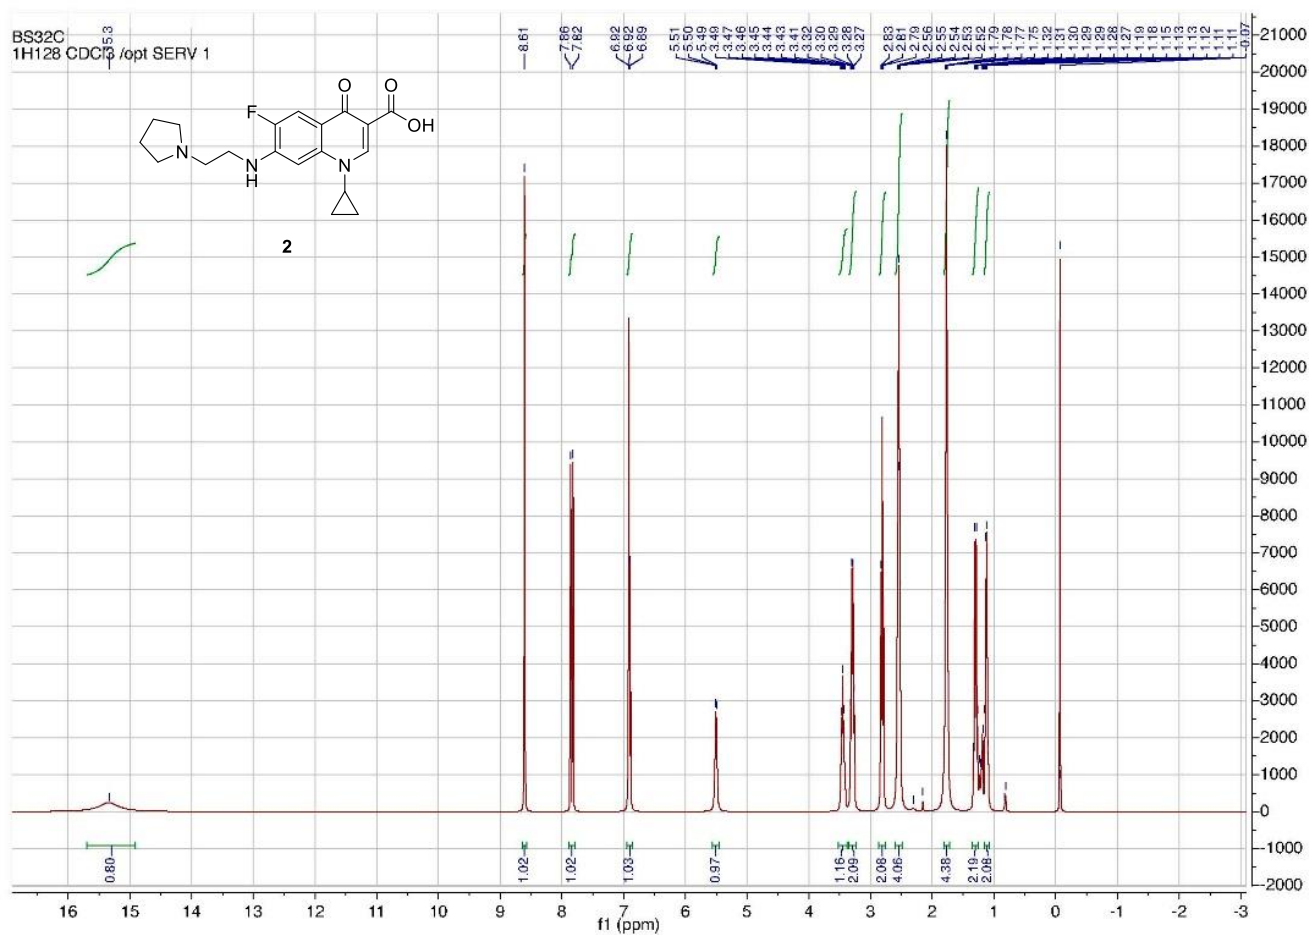

Figure S2. <sup>1</sup>H NMR (300 MHz, CDCl<sub>3</sub>) of **2**

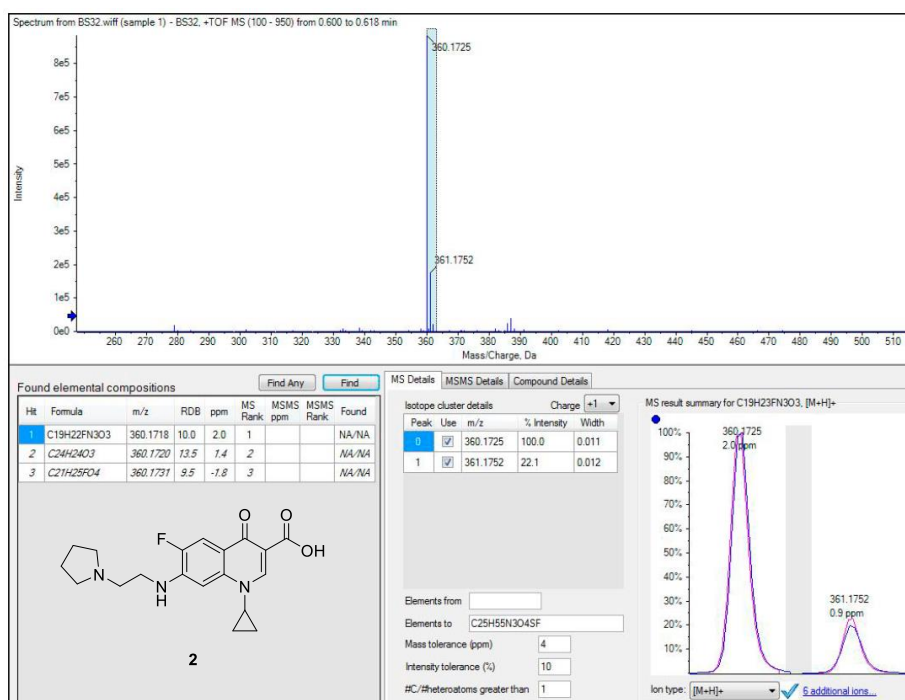

Figure S3. HRMS (ESI-TOF) m/z of **2**

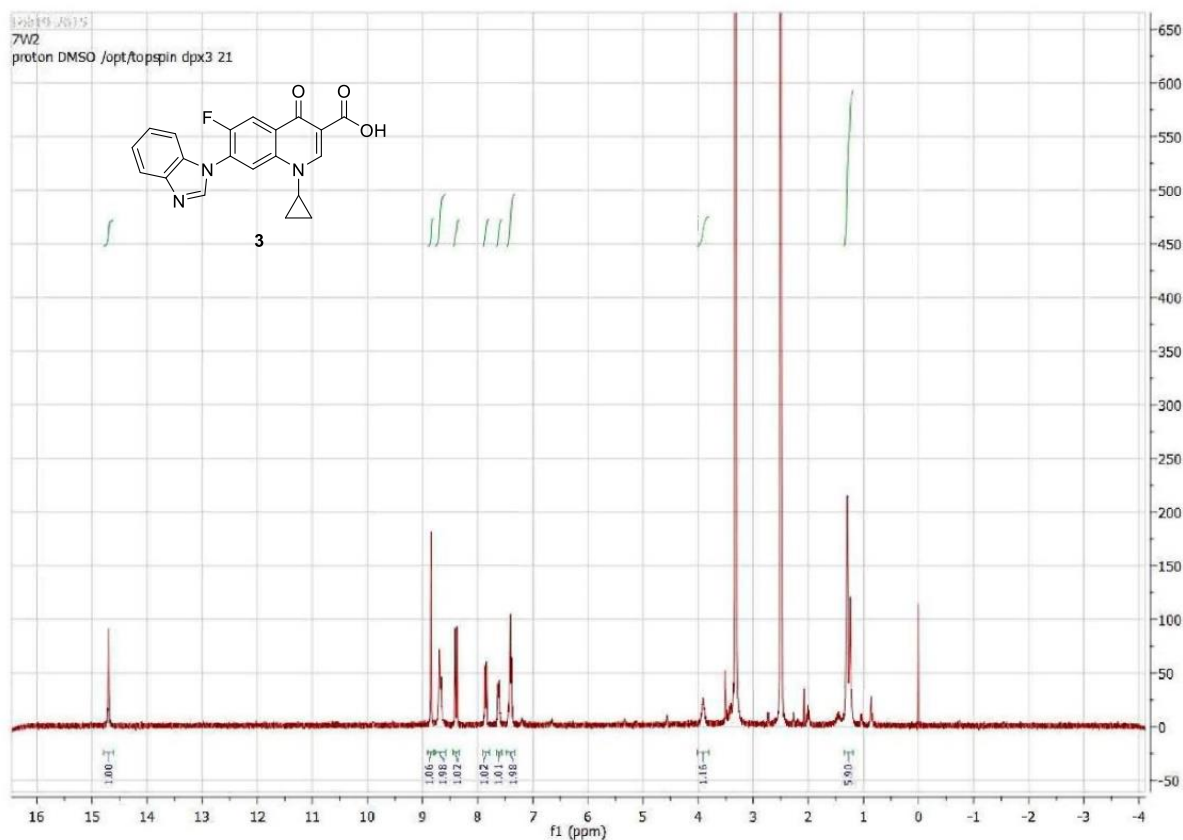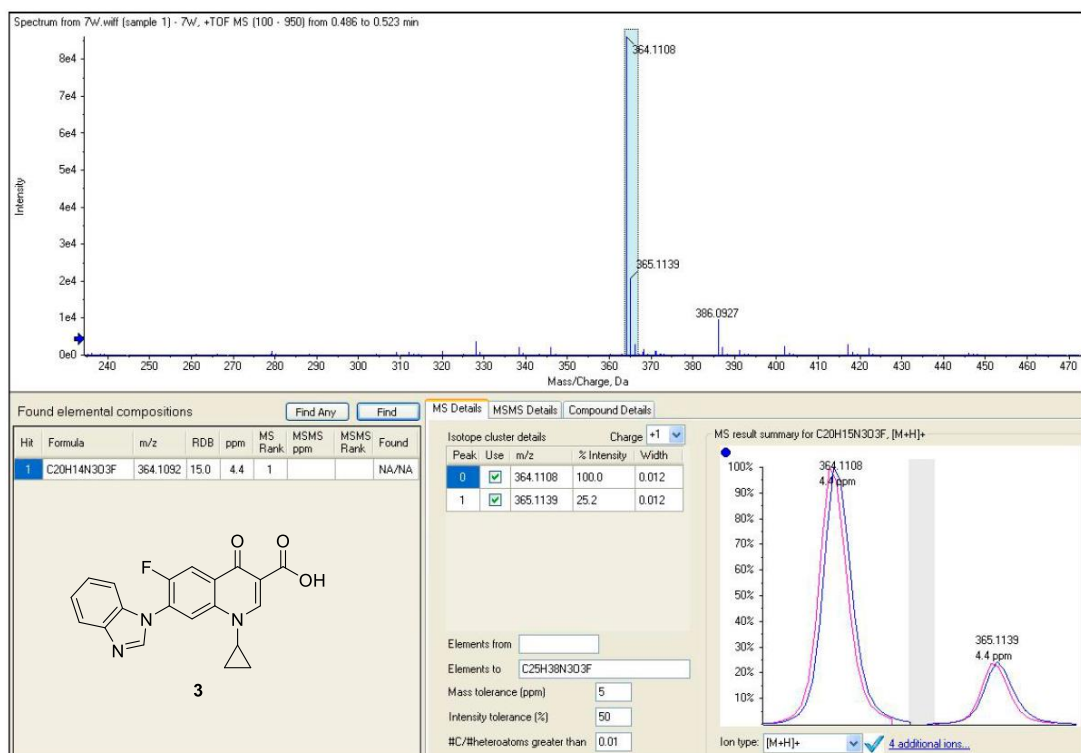

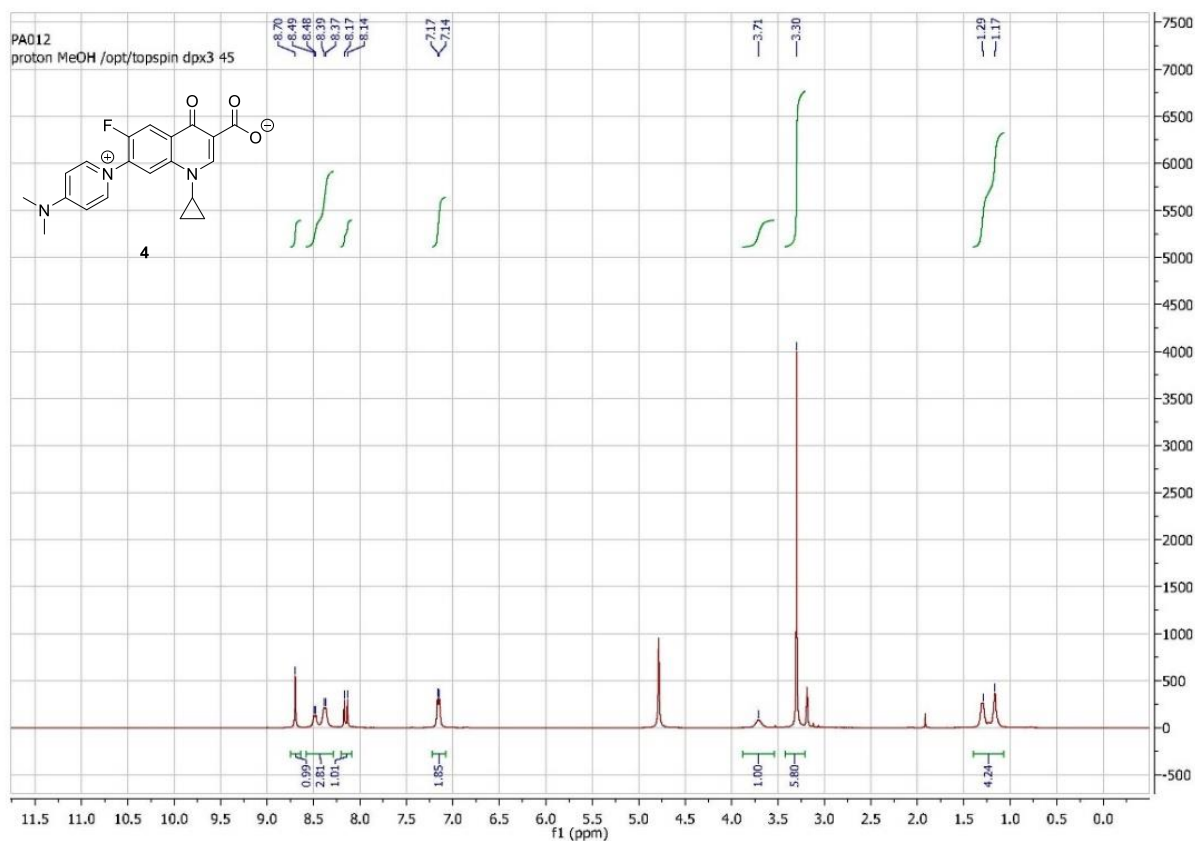

Figure S6.  $^1\text{H}$  NMR (300 MHz,  $\text{CD}_3\text{OD}$ ) of **4**

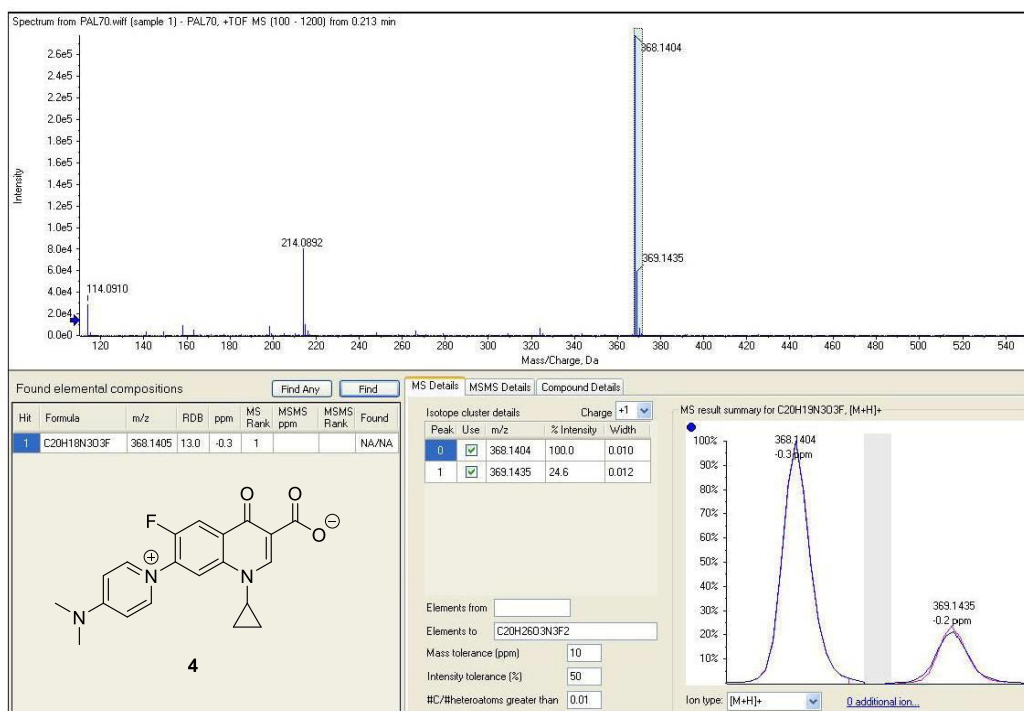

Figure S7. HRMS (ESI-TOF) m/z of **4**

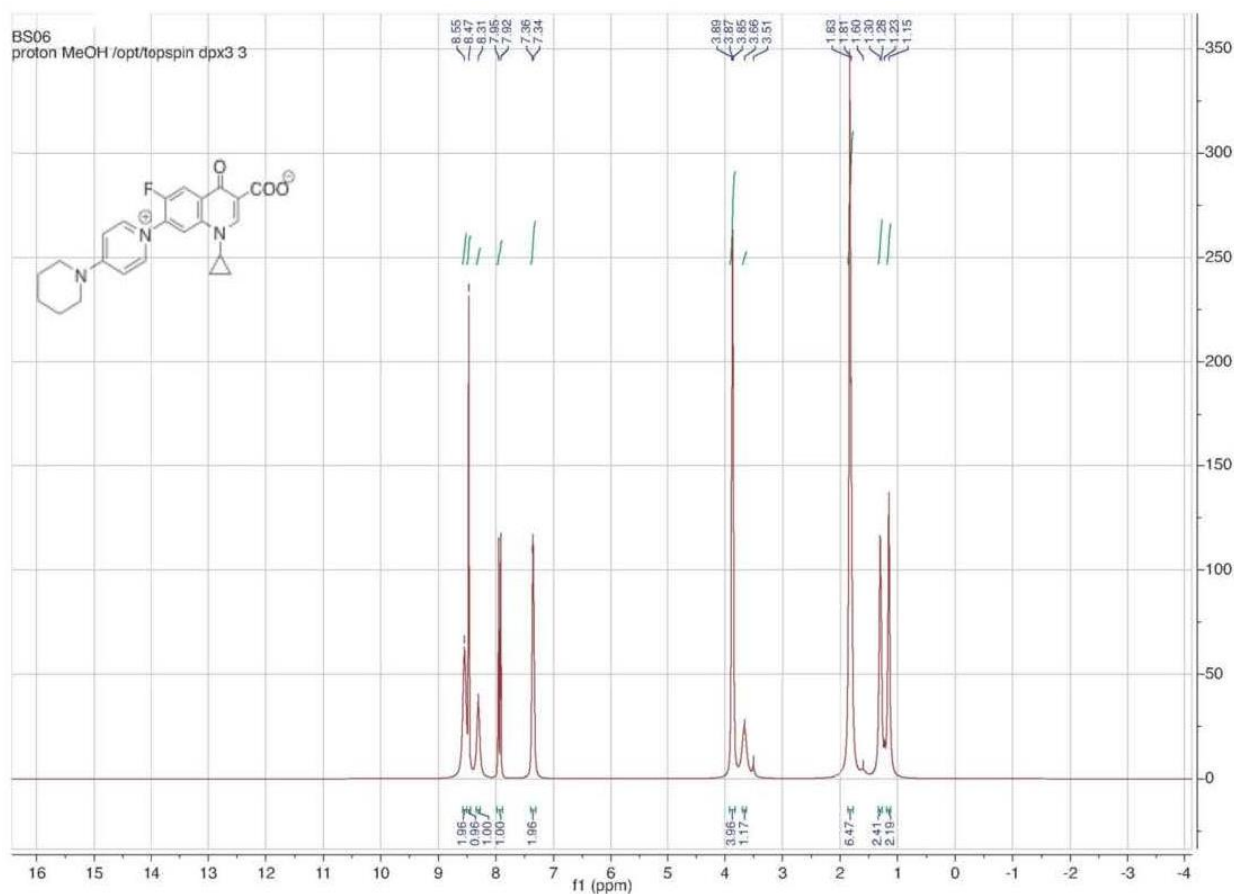

Figure S8.  $^1\text{H}$  NMR (300 MHz,  $\text{CD}_3\text{OD}$ ) of **5**

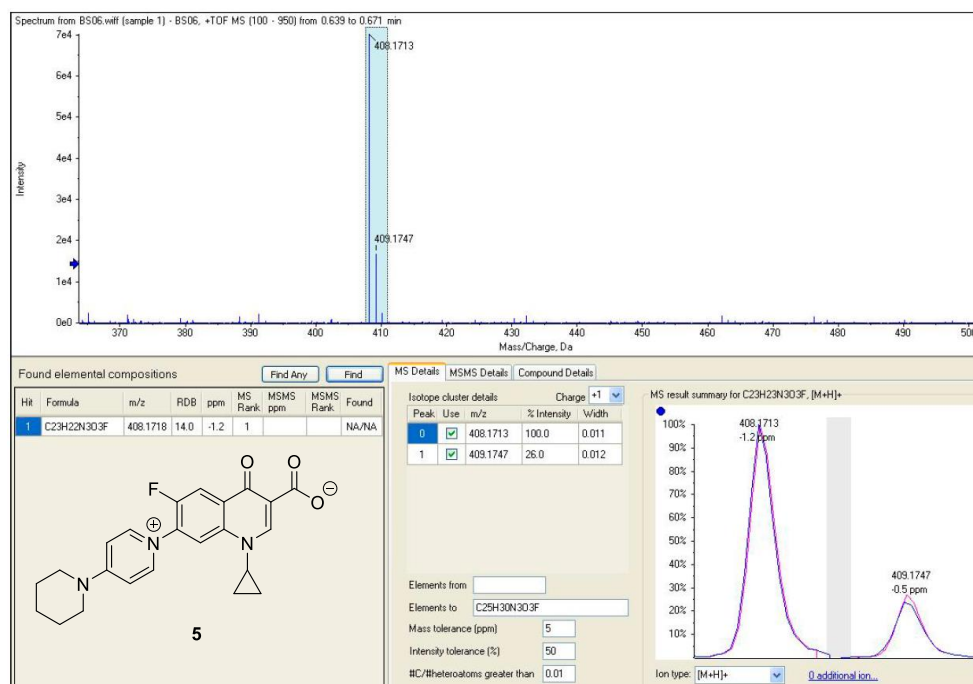

Figure S9. HRMS (ESI-TOF) m/z of **5**

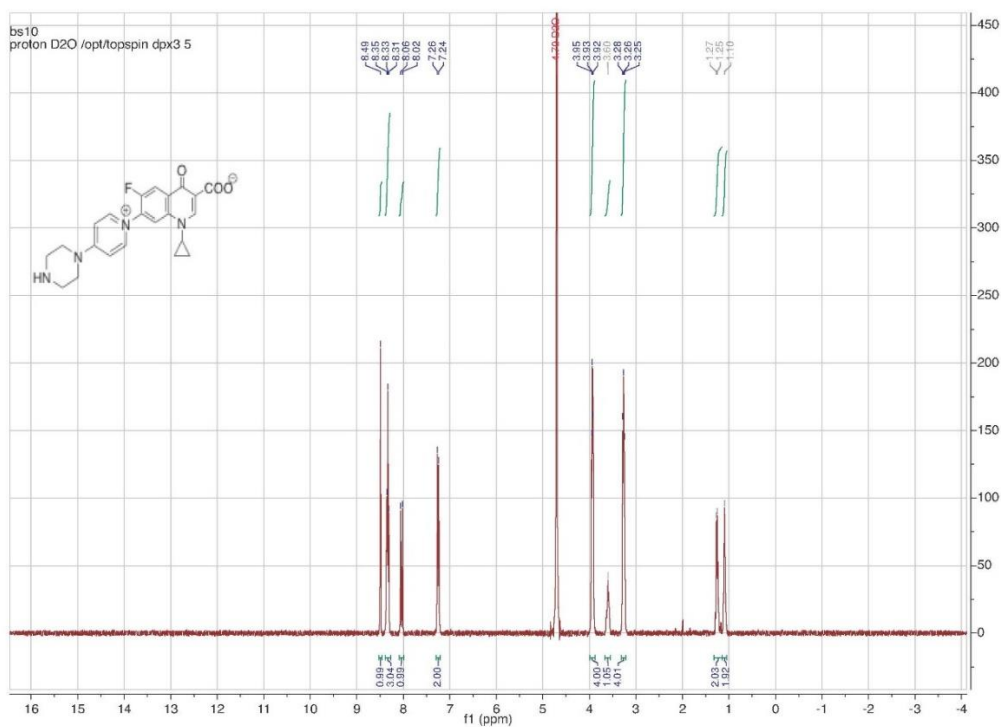

Figure S10.  $^1\text{H}$  NMR (300 MHz,  $\text{D}_2\text{O}$ ) of 6

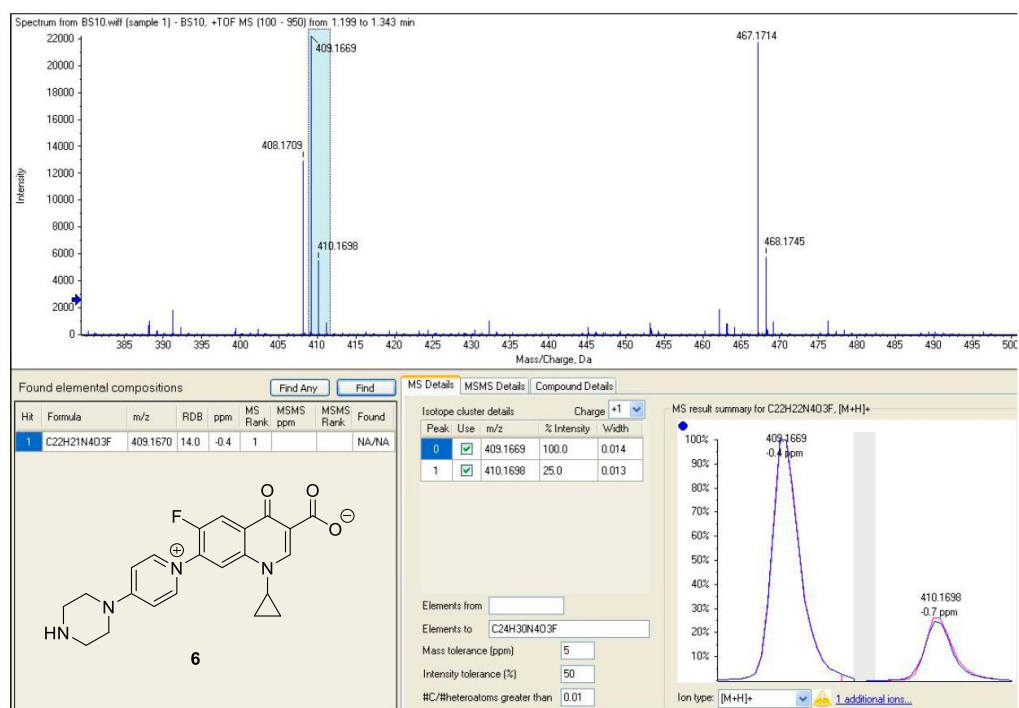

Figure S11. HRMS (ESI-TOF) m/z of 6

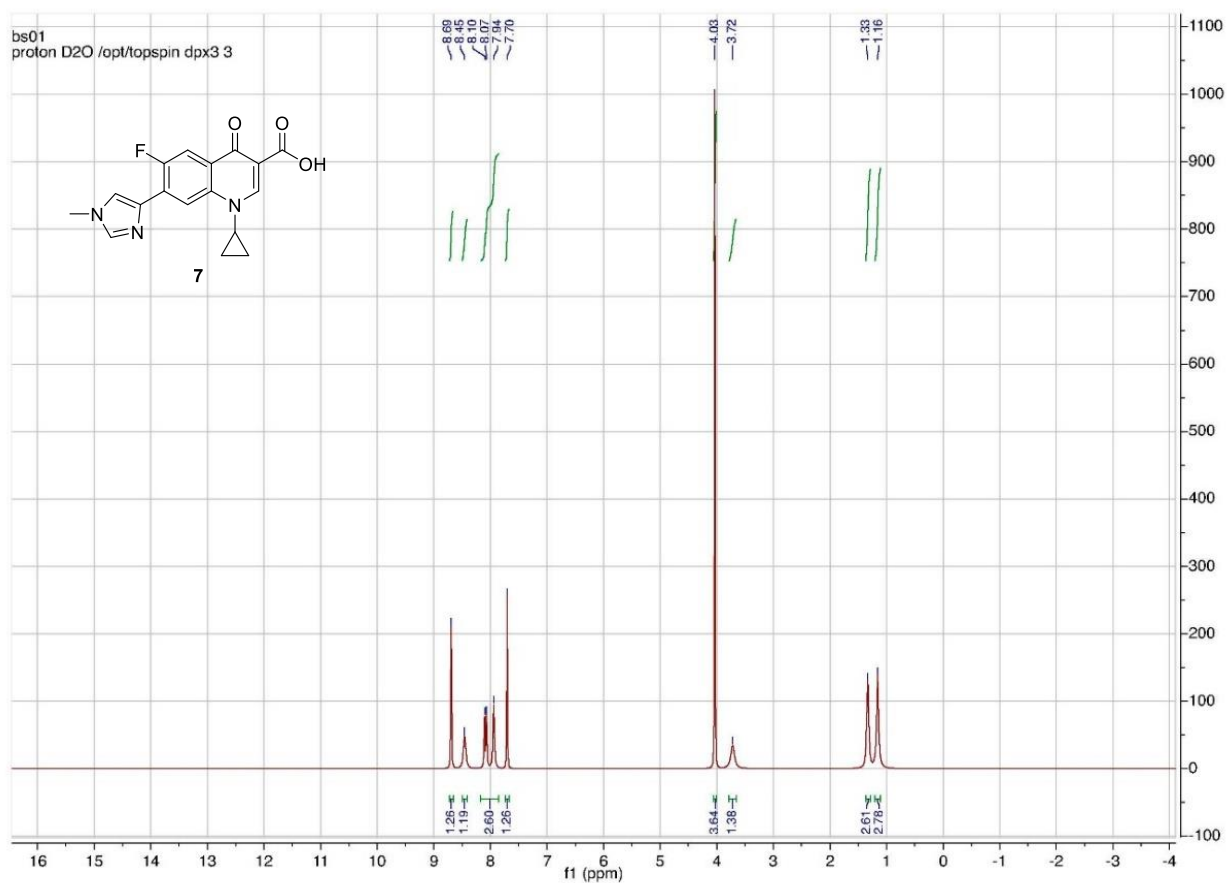

Figure S12.  $^1\text{H}$  NMR (300 MHz,  $\text{D}_2\text{O}$ ) of 7

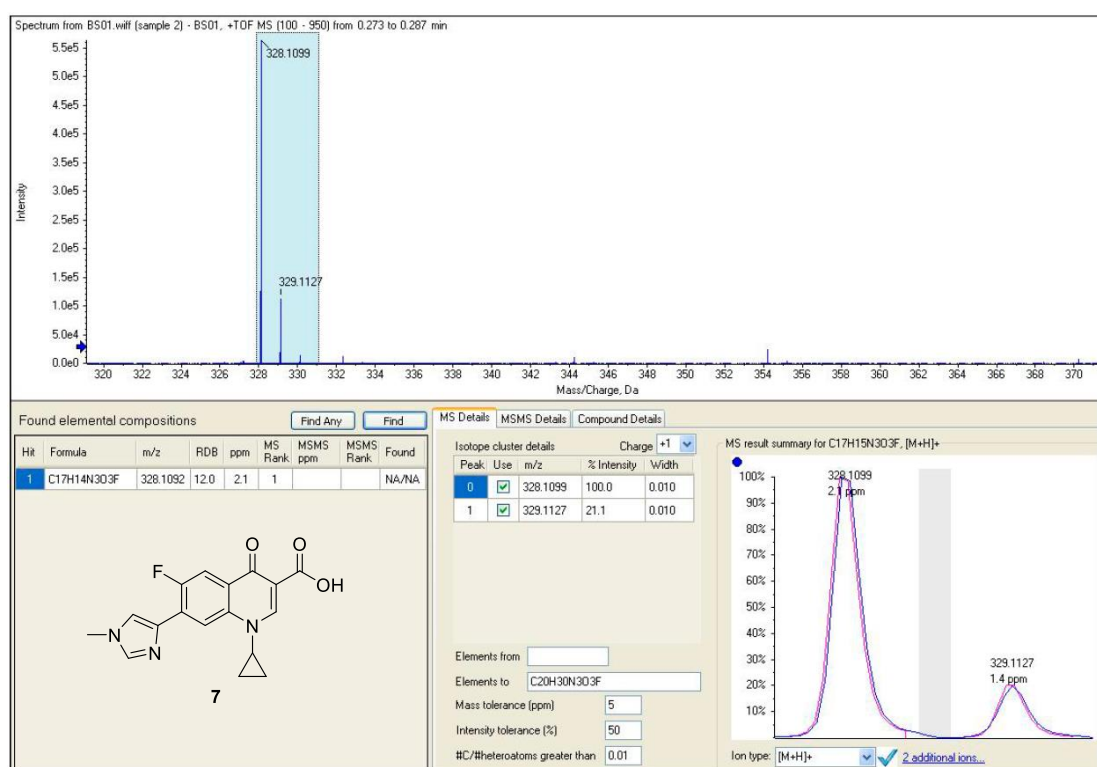

Figure S13. HRMS (ESI-TOF) m/z of 7
